# Supplementary material
Source: ML conference proceedings conference paper supplement (https://proceedings.neurips.cc/paper_files/paper/2019/hash/98baeb82b676b662e12a7af8ad9212f6-Abstract.html)
Supplement: Supplementary file [file 98baeb82b676b662e12a7af8ad9212f6-Supplemental.zip]

## A Representation Power of $\mathcal{F}_{B,m}$

### A.1 Background on RKHS

We consider the following kernel function

$$K(x, y) = \int_{\mathcal{W}} \phi(x; w) \phi(y; w) p(w) dw. \quad (\text{A.1})$$

Here  $\phi$  is a random feature map parametrized by  $w$ , which follows a distribution with density  $p(\cdot)$  [43]. Any function in the RKHS induced by  $K(\cdot, \cdot)$  takes the form

$$f_c(x) = \int_{\mathcal{W}} c(w) \phi(x; w) p(w) dw, \quad (\text{A.2})$$

such that each  $c(\cdot)$  corresponds to a function  $f_c(\cdot)$ . The following lemma connects the  $\mathcal{H}$ -norm of  $f_c(\cdot)$  to the  $\ell_2$ -norm of  $c(\cdot)$  associated with the density  $p(\cdot)$ , denoted as  $\|c\|_p$ .

**Lemma A.1.** It holds that  $\|f_c\|_{\mathcal{H}}^2 = \|c\|_p^2 = \int c(w)^2 p(w) dw$ .

*Proof.* Recall if  $f(x) = \int_{\mathcal{X}} a(y) K(x, y) dy$ , then by the reproducing property [27], we have

$$\|f\|_{\mathcal{H}}^2 = \int_{\mathcal{X} \times \mathcal{X}} a(x) a(y) K(x, y) dx dy.$$

Now we write  $f(\cdot)$  in the form of (A.2). By (A.1), we have

$$\begin{aligned} f(x) &= \int_{\mathcal{X}} a(y) K(x, y) dy \\ &= \int_{\mathcal{X}} a(y) \int_{\mathcal{W}} \phi(x; w) \phi(y; w) p(w) dw dy \\ &= \int_{\mathcal{W}} \underbrace{\left( \int_{\mathcal{X}} a(y) \phi(y; w) dy \right)}_{c(w)} \phi(x; w) p(w) dw. \end{aligned}$$

Thus, for  $c(w) = \int_{\mathcal{X}} a(y) \phi(y; w) dy$ , we have

$$\begin{aligned} \|f\|_{\mathcal{H}}^2 &= \int_{\mathcal{X} \times \mathcal{X}} a(y) a(x) K(x, y) dx dy \\ &= \int_{\mathcal{X} \times \mathcal{X}} a(y) a(x) \left( \int_{\mathcal{W}} \phi(x; w) \phi(y; w) p(w) dw \right) dx dy \\ &= \int_{\mathcal{W}} \left( \int_{\mathcal{X}} a(y) \phi(y; w) dy \right) \left( \int_{\mathcal{X}} a(x) \phi(x; w) dx \right) p(w) dw \\ &= \int_{\mathcal{W}} c(w)^2 p(w) dw = \|c\|_p^2, \end{aligned}$$

which completes the proof of Lemma A.1.  $\square$

### A.2 $\mathcal{F}_{B,\infty}$ as RKHS

We characterize the approximate stationary point  $\widehat{Q}_0(x; W^*)$  defined in Definition 4.1, which is attained by Algorithm 1 according to Theorems 4.4 and 4.6. We focus on its representation power when  $m \rightarrow \infty$ . We first write  $\mathcal{F}_{B,m}$  in (4.5) as

$$\mathcal{F}_{B,m} = \left\{ f(x) = \widehat{Q}(x; W(0)) + \sum_{r=1}^m \phi_r(x)^\top (W_r - W_r(0)) : W \in S_B \right\}, \quad (\text{A.3})$$

where the feature map  $\{\phi_r(x)\}_{r=1}^m$  is defined as

$$\phi_r(x) = \frac{1}{\sqrt{m}} \cdot \phi(x; W_r(0)) = \frac{1}{\sqrt{m}} \cdot \mathbb{1}\{W_r(0)^\top x > 0\} x \text{ for any } r \in [m].$$

As  $m \rightarrow \infty$ , the empirical distribution supported on  $\{\phi_r(x)\}_{r=1}^m$ , which has sample size  $m$ , converges to the corresponding population distribution. Therefore, from (A.3) we obtain

$$\mathcal{F}_{B,\infty} = \left\{ f(x) = f_0(x) + \int \phi(x; w)^\top \alpha(w) \cdot p(w) dw : \int \|\alpha(w)\|_2^2 \cdot p(w) dw \leq B^2 \right\}.$$

Here  $p(w)$  is the density of  $N(0, I_d/d)$  and  $f_0(x) = \lim_{m \rightarrow \infty} \widehat{Q}(x; W(0))$ , which by the central limit theorem is a Gaussian process indexed by  $x$ . Furthermore, as discussed in Appendix A.1,  $\phi(x; W)$  induces an RKHS, namely  $\mathcal{H}$ , which is the completion of the set of all functions that take the form

$$f(x) = \sum_{i=1}^N a_i K(x, x_i), \quad x_i \in \mathcal{X}, \quad a_i \in \mathbb{R}, \quad N \in \mathbb{N},$$

$$\text{where } K(x, y) = \mathbb{E}_{w \sim N(0, I_d/d)} [\mathbb{1}\{w^\top x > 0, w^\top y > 0\} x^\top y].$$

In particular,  $\mathcal{H}$  is equipped with the inner product induced by  $\langle K(\cdot, x_i), K(\cdot, x_j) \rangle_{\mathcal{H}} = K(x_i, x_j)$ . [44] prove that, similar to Lemma A.1, for any  $f_1(\cdot) = \int \phi(\cdot; w)^\top \alpha_1(w) \cdot p(w) dw$  and  $f_2(\cdot) = \int \phi(\cdot; w)^\top \alpha_2(w) \cdot p(w) dw$ , we have  $f_1, f_2 \in \mathcal{H}$ , and moreover, their inner product has the following equivalence

$$\langle f_1, f_2 \rangle_{\mathcal{H}} = \int \alpha_1(w)^\top \alpha_2(w) \cdot p(w) dw.$$

As a result, we have

$$\mathcal{F}_{B,\infty} = \{f = f_0 + h : \|h\|_{\mathcal{H}} \leq B\}, \quad (\text{A.4})$$

which is known to be a rich function class [27]. As  $m \rightarrow \infty$ ,  $\widehat{Q}_0(\cdot; W^*)$  becomes the fixed-point solution to the projected Bellman equation

$$Q = \Pi_{\mathcal{F}_{B,\infty}} \mathcal{T}^\pi Q,$$

which also implies that  $\widehat{Q}_0(\cdot; W^*)$  is the global optimum of the MSPBE

$$\mathbb{E}_\mu [(Q(x) - \Pi_{\mathcal{F}_{B,\infty}} \mathcal{T}^\pi Q(x))^2].$$

If we further assume that the Bellman evaluation operator  $\mathcal{T}^\pi$  satisfies  $\mathcal{T}^\pi \widehat{Q}_0(\cdot; W^*) - f_0(\cdot) \in \mathcal{H}$  and  $B$  is sufficiently large such that  $\|\mathcal{T}^\pi \widehat{Q}_0(\cdot; W^*) - f_0(\cdot)\|_{\mathcal{H}} \leq B$ , then the projection  $\Pi_{\mathcal{F}_{B,\infty}}$  reduces to identity at  $\mathcal{T}^\pi \widehat{Q}_0(\cdot; W^*)$ , which implies  $\widehat{Q}_0(\cdot; W^*) = Q^\pi(\cdot)$  as they both solve the Bellman equation  $Q = \mathcal{T}^\pi Q$ . In other words, if the Bellman evaluation operator is closed with respect to  $\mathcal{F}_{B,\infty}$ , which up to the intercept of  $f_0(\cdot)$  is a ball with radius  $B$  in  $\mathcal{H}$ , the approximate stationary point  $\widehat{Q}_0(\cdot; W^*)$  is the unique fixed-point solution to the Bellman equation or equivalently the global optimum of the MSBE

$$\mathbb{E}_\mu [(Q(x) - \mathcal{T}^\pi Q(x))^2].$$

## B Proofs for Section 4

### B.1 Proof of Lemma 4.2

*Proof.* Following the same argument for  $W^\dagger$  in (4.4) and the definition of  $W^*$  in (4.6), we know that  $W^*$  being an approximate stationary point is equivalent to  $\widehat{Q}_0(\cdot; W^*)$  being a fixed-point solution to the projected Bellman equation

$$Q = \Pi_{\mathcal{F}_{B,m}} \mathcal{T}^\pi Q. \quad (\text{B.1})$$

Meanwhile, the Bellman evaluation operator  $\mathcal{T}^\pi$  is a  $\gamma$ -contraction in the  $\ell_2$ -norm  $\|\cdot\|_\mu$  with  $\gamma < 1$ , since

$$\begin{aligned} \mathbb{E}_{x \sim \mu} [(\mathcal{T}^\pi Q_1(x) - \mathcal{T}^\pi Q_2(x))^2] &= \gamma^2 \mathbb{E}_{x \sim \mu} [(\mathbb{E}[Q_1(x') - Q_2(x') \mid s' \sim \mathcal{P}(\cdot \mid s, a), a' \sim \pi(s')])^2] \\ &\leq \gamma^2 \mathbb{E}_{x \sim \mu} [(Q_1(x) - Q_2(x))^2], \end{aligned}$$

where the second equality follows from Hölder's inequality and the fact that marginally  $x'$  and  $x$  have the same stationary distribution. Since the projection onto a convex set is nonexpansive,  $\Pi_{\mathcal{F}_{B,m}} \mathcal{T}^\pi$  is also a  $\gamma$ -contraction. Thus, the projected Bellman equation in (B.1) has a unique fixed-point solution  $\widehat{Q}_0(\cdot; W^*)$  in  $\mathcal{F}_{B,m}$ , which corresponds to an approximate stationary point  $W^*$ .  $\square$

## B.2 Proof of Lemma 4.5

*Proof.* It suffices to show that  $\mathbb{E}_{\text{init},\mu}[\|g(t)\|_2^2]$  is both upper bounded. By (4.10) we have

$$\mathbb{E}_{\text{init},\mu}[\|g(t)\|_2^2] = \mathbb{E}_{\text{init},\mu}\left[\left\|\delta(x, r, x'; W(t)) \cdot \nabla_W \widehat{Q}_t(x)\right\|_2^2\right] \leq \mathbb{E}_{\text{init},\mu}\left[\left|\delta(x, r, x'; W(t))\right|^2\right], \quad (\text{B.2})$$

where the inequality follows from the fact that, for any  $W \in S_B$ ,

$$\|\nabla_W \widehat{Q}(x; W)\|_2 = \frac{1}{m} \sum_{r=1}^m \mathbb{1}\{W^\top x > 0\} \cdot \|x\|_2^2 \leq 1 \quad (\text{B.3})$$

almost everywhere. Using the fact that  $x$  and  $x'$  have the same marginal distribution we obtain

$$\mathbb{E}_{\text{init},\mu}\left[\left|\delta(x, r, x'; W(t))\right|^2\right] \leq \mathbb{E}_{\text{init},\mu}\left[3(\widehat{Q}_t(x)^2 + \bar{r}^2 + \widehat{Q}_t(x')^2)\right] = \mathbb{E}_{\text{init},\mu}[6\widehat{Q}_t(x)^2 + 3\bar{r}^2]. \quad (\text{B.4})$$

By (B.3), we know that  $\widehat{Q}(x; W)$  is 1-Lipschitz continuous with respect to  $W$ . Therefore, we have

$$|\widehat{Q}_t(x) - \widehat{Q}_0(x)| \leq \|W(t) - W(0)\|_2 \leq B, \quad (\text{B.5})$$

Plugging (B.5) into (B.4) and using the Cauchy-Schwarz inequality we obtain

$$\mathbb{E}_{\text{init},\mu}\left[\left|\delta(x, r, x'; W(t))\right|^2\right] \leq \mathbb{E}_{\text{init},\mu}[12\widehat{Q}_0(x)^2 + 12B^2 + 3\bar{r}^2]. \quad (\text{B.6})$$

Note that by the initialization of  $\widehat{Q}_0(x)$  as defined in (3.2), we have

$$\mathbb{E}_{\text{init},\mu}[\widehat{Q}_0(x)^2] = \frac{1}{m} \sum_{r=1}^m \mathbb{E}_{\text{init}}[\sigma(W_r(0)^\top x)^2] \leq \mathbb{E}_{w \sim N(0, I_d/d)}[\|w\|_2^2] = 1. \quad (\text{B.7})$$

Combining (B.2), (B.6), and (B.7) we obtain  $\mathbb{E}_{\text{init},\mu}[\|g(t)\|_2^2] = O(B^2)$ . Since

$$\mathbb{E}_{\text{init},\mu}[\|g(t) - \bar{g}(t)\|_2^2] = \mathbb{E}_{\text{init}}\left[\mathbb{E}_\mu[\|g(t) - \bar{g}(t)\|_2^2]\right] \leq \mathbb{E}_{\text{init}}\left[\mathbb{E}_\mu[\|g(t)\|_2^2]\right] = \mathbb{E}_{\text{init},\mu}[\|g(t)\|_2^2],$$

we conclude the proof of Lemma 4.5.  $\square$

## B.3 Proof of Proposition 4.7

*Proof.* By the triangle inequality, we have

$$\|\widehat{Q}_0(\cdot; W^*) - Q^\pi(\cdot)\|_\mu \leq \|\widehat{Q}_0(\cdot; W^*) - \Pi_{\mathcal{F}_{B,m}} Q^\pi(\cdot)\|_\mu + \|\Pi_{\mathcal{F}_{B,m}} Q^\pi(\cdot) - Q^\pi(\cdot)\|_\mu. \quad (\text{B.8})$$

Since  $Q^\pi(\cdot)$  is the fixed-point solution to the Bellman equation, we replace  $Q^\pi(\cdot)$  by  $\mathcal{T}^\pi Q^\pi(\cdot)$  and obtain

$$\Pi_{\mathcal{F}_{B,m}} Q^\pi(\cdot) = \Pi_{\mathcal{F}_{B,m}} \mathcal{T}^\pi Q^\pi(\cdot). \quad (\text{B.9})$$

Meanwhile, by Lemma 4.2,  $\widehat{Q}_0(\cdot; W^*)$  is the solution to the projected Bellman equation, that is,

$$\widehat{Q}_0(\cdot; W^*) = \Pi_{\mathcal{F}_{B,m}} \mathcal{T}^\pi \widehat{Q}_0(\cdot; W^*). \quad (\text{B.10})$$

Combining (B.9) and (B.10), we obtain

$$\begin{aligned} \|\widehat{Q}_0(\cdot; W^*) - \Pi_{\mathcal{F}_{B,m}} Q^\pi(\cdot)\|_\mu &= \|\Pi_{\mathcal{F}_{B,m}} \mathcal{T}^\pi \widehat{Q}_0(\cdot; W^*) - \Pi_{\mathcal{F}_{B,m}} \mathcal{T}^\pi Q^\pi(\cdot)\|_\mu \\ &\leq \gamma \cdot \|\widehat{Q}_0(\cdot; W^*) - Q^\pi(\cdot)\|_\mu, \end{aligned} \quad (\text{B.11})$$

where the inequality follows from the fact that  $\Pi_{\mathcal{F}_{B,m}} \mathcal{T}^\pi$  is a  $\gamma$ -contraction, as discussed in the proof of Lemma 4.2. Plugging (B.11) into (B.8), we obtain

$$(1 - \gamma) \cdot \|\widehat{Q}_0(\cdot; W^*) - Q^\pi(\cdot)\|_\mu \leq \|\Pi_{\mathcal{F}_{B,m}} Q^\pi(\cdot) - Q^\pi(\cdot)\|_\mu,$$

which completes the proof of Proposition 4.7.  $\square$

## C Proofs for Section 5

### C.1 Proof of Lemma 5.1

*Proof.* By the definition that  $\widehat{Q}_t(x) = \widehat{Q}(x; W(t))$  and the definition of  $\widehat{Q}_0(x; W(t))$  in (4.7), we have

$$\begin{aligned} & |\widehat{Q}_t(x) - \widehat{Q}_0(x; W(t))| \\ &= \frac{1}{\sqrt{m}} \left| \sum_{r=1}^m (\mathbb{1}\{W_r(t)^\top x > 0\} - \mathbb{1}\{W_r(0)^\top x > 0\}) \cdot b_r W_r(t)^\top x \right| \\ &\leq \frac{1}{\sqrt{m}} \sum_{r=1}^m |\mathbb{1}\{W_r(t)^\top x > 0\} - \mathbb{1}\{W_r(0)^\top x > 0\}| \cdot (|W_r(0)^\top x| + \|W_r(t) - W_r(0)\|_2), \end{aligned} \quad (\text{C.1})$$

where we use the fact that  $\|x\|_2 = 1$ . Note that  $\mathbb{1}\{W_r(t)^\top x > 0\} \neq \mathbb{1}\{W_r(0)^\top x > 0\}$  implies

$$|W_r(0)^\top x| \leq |W_r(t)^\top x - W_r(0)^\top x| \leq \|W_r(t) - W_r(0)\|_2.$$

Thus, we obtain

$$|\mathbb{1}\{W_r(t)^\top x > 0\} - \mathbb{1}\{W_r(0)^\top x > 0\}| \leq \mathbb{1}\{|W_r(0)^\top x| \leq \|W_r(t) - W_r(0)\|_2\}. \quad (\text{C.2})$$

Plugging (C.2) into (C.1), we obtain the following upper bound,

$$\begin{aligned} & |\widehat{Q}_t(x) - \widehat{Q}_0(x; W(t))| \\ &\leq \frac{1}{\sqrt{m}} \sum_{r=1}^m \mathbb{1}\{|W_r(0)^\top x| \leq \|W_r(t) - W_r(0)\|_2\} \cdot (|W_r(0)^\top x| + \|W_r(t) - W_r(0)\|_2) \\ &\leq \frac{2}{\sqrt{m}} \sum_{r=1}^m \mathbb{1}\{|W_r(0)^\top x| \leq \|W_r(t) - W_r(0)\|_2\} \cdot \|W_r(t) - W_r(0)\|_2. \end{aligned}$$

Here the second inequality follows from the fact that

$$\mathbb{1}\{|x| \leq y\} |x| \leq \mathbb{1}\{|x| \leq y\} y$$

for any  $x$  and  $y > 0$ . To characterize  $\mathbb{E}_{\text{init}, \mu} [|\widehat{Q}_t(x) - \widehat{Q}_0(x; W(t))|^2]$ , we first invoke the Cauchy-Schwarz inequality and the fact that  $\|W(t) - W(0)\|_2 \leq B$ , which gives

$$|\widehat{Q}_t(x) - \widehat{Q}_0(x; W(t))|^2 \leq \frac{4B^2}{m} \sum_{r=1}^m \mathbb{1}\{|W_r(0)^\top x| \leq \|W_r(t) - W_r(0)\|_2\}.$$

Taking expectation on both sides, by Lemma D.1 we obtain

$$\mathbb{E}_{\text{init}, \mu} [|\widehat{Q}_t(x) - \widehat{Q}_0(x; W(t))|^2] \leq 4c_1 B^3 \cdot m^{-1/2}.$$

Thus, we finish the proof of Lemma 5.1.  $\square$

### C.2 Proof of Lemma 5.2

*Proof.* By the definition of  $\bar{g}(t)$  and  $\bar{g}_0(t)$  in (5.1) and (5.2), respectively, we have

$$\begin{aligned} \|\bar{g}(t) - \bar{g}_0(t)\|_2 &= \|\mathbb{E}_\mu [\delta(x, r, x'; W(t)) \cdot \nabla_W \widehat{Q}_t(x) - \delta_0(x, r, x'; W(t)) \cdot \nabla_W \widehat{Q}_0(x; W(t))]\|_2 \\ &\leq \left\| \mathbb{E}_\mu \left[ \left( \delta(x, r, x'; W(t)) - \delta_0(x, r, x'; W(t)) \right) \cdot \nabla_W \widehat{Q}_t(x) \right. \right. \\ &\quad \left. \left. + \delta_0(x, r, x'; W(t)) \cdot \left( \nabla_W \widehat{Q}_t(x) - \nabla_W \widehat{Q}_0(x; W(t)) \right) \right] \right\|_2 \\ &\leq \mathbb{E}_\mu \left[ \left| \delta(x, r, x'; W(t)) - \delta_0(x, r, x'; W(t)) \right| \right. \\ &\quad \left. + \left| \delta_0(x, r, x'; W(t)) \right| \cdot \left\| \nabla_W \widehat{Q}_t(x) - \nabla_W \widehat{Q}_0(x; W(t)) \right\|_2 \right]. \end{aligned} \quad (\text{C.3})$$

Here to obtain the second inequality, we use the fact that, for any  $t \in [T]$ ,

$$\|\nabla_W \widehat{Q}_t(x)\|_2 \leq \|x\|_2 = 1.$$

Taking expectation with respect to the random initialization on the both sides of (C.3), we obtain

$$\begin{aligned} & \mathbb{E}_{\text{init}} [\|\bar{g}(t) - \bar{g}_0(t)\|_2^2] \\ & \leq \underbrace{2\mathbb{E}_{\text{init},\mu} \left[ \left| \delta(x, r, x'; W(t)) - \delta_0(x, r, x'; W(t)) \right|^2 \right]}_{(i)} \\ & \quad + 2\mathbb{E}_{\text{init}} \left[ \underbrace{\mathbb{E}_\mu \left[ \left| \delta_0(x, r, x'; W(t)) \right|^2 \right]}_{(iii)} \cdot \underbrace{\mathbb{E}_\mu \left[ \left\| \nabla_W \widehat{Q}_t(x) - \nabla_W \widehat{Q}_0(x; W(t)) \right\|_2^2 \right]}_{(ii)} \right]. \end{aligned} \quad (\text{C.4})$$

In the following, we characterize the three terms on the right-hand side of (C.4).

For (i) in (C.4), note that

$$\begin{aligned} & \left| \delta(x, r, x'; W(t)) - \delta_0(x, r, x'; W(t)) \right|^2 \\ & = \left| \left( \widehat{Q}_t(x) - r - \gamma \widehat{Q}_t(x') \right) - \left( \widehat{Q}_0(x; W(t)) - r - \gamma \widehat{Q}_0(x'; W(t)) \right) \right|^2 \\ & = \left| \left( \widehat{Q}_t(x) - \widehat{Q}_0(x; W(t)) \right) - \gamma \left( \widehat{Q}_t(x') - \widehat{Q}_0(x'; W(t)) \right) \right|^2 \\ & \leq 2 \left( \widehat{Q}_t(x) - \widehat{Q}_0(x; W(t)) \right)^2 + 2 \left( \widehat{Q}_t(x') - \widehat{Q}_0(x'; W(t)) \right)^2. \end{aligned} \quad (\text{C.5})$$

Since  $x$  and  $x'$  follow the same stationary distribution  $\mu$  on the right-hand side of (C.5), by Lemma 5.1 we have

$$\begin{aligned} & \mathbb{E}_{\text{init},\mu} \left[ \left| \delta(x, r, x'; W(t)) - \delta_0(x, r, x'; W(t)) \right|^2 \right] \\ & \leq 4\mathbb{E}_{\text{init},\mu} \left[ \left| \widehat{Q}_t(x) - \widehat{Q}_0(x; W(t)) \right|^2 \right] \leq 16c_1 B^3 \cdot m^{-1/2}. \end{aligned} \quad (\text{C.6})$$

For (ii) in (C.4), we have

$$\begin{aligned} \left\| \nabla_W \widehat{Q}_t(x) - \nabla_W \widehat{Q}_0(x; W(t)) \right\|_2^2 &= \frac{1}{m} \sum_{r=1}^m (\mathbb{1}\{W_r(t)^\top > 0\} - \mathbb{1}\{W_r(0)^\top > 0\})^2 \|x\|_2^2 \\ &\leq \frac{1}{m} \sum_{r=1}^m \mathbb{1}\{|W_r(0)^\top x| \leq \|W_r(t) - W_r(0)\|_2\}, \end{aligned} \quad (\text{C.7})$$

where the inequality follows from (C.2) and the fact that  $\|x\|_2 = 1$ .

For (iii) in (C.4), we have

$$\left| \delta_0(x, r, x'; W(t)) \right|^2 \leq 3 \left( \widehat{Q}_0(x; W(t))^2 + \bar{r}^2 + \gamma^2 \widehat{Q}_0(x'; W(t))^2 \right). \quad (\text{C.8})$$

To obtain an upper bound of the right-hand side of (C.8), we use the fact that

$$\left| \widehat{Q}_0(x; W(t)) - \widehat{Q}_0(x) \right| \leq \|W(t) - W(0)\|_2 \cdot \|x\|_2 \leq B,$$

which follows from (4.7), and obtain

$$\mathbb{E}_\mu [\widehat{Q}_0(x; W(t))^2] = \mathbb{E}_\mu \left[ \left( \widehat{Q}_0(x) + \widehat{Q}_0(x; W(t)) - \widehat{Q}_0(x) \right)^2 \right] \leq 2\mathbb{E}_\mu [\widehat{Q}_0(x)^2] + 2B^2.$$

Since  $x$  and  $x'$  follow the same stationary distribution  $\mu$  on the right-hand side of (C.8) and  $|\gamma| < 1$ , we have

$$\mathbb{E}_\mu \left[ \left| \delta_0(x, r, x'; W(t)) \right|^2 \right] \leq 12\mathbb{E}_\mu [\widehat{Q}_0(x)^2] + 12B^2 + 3\bar{r}^2. \quad (\text{C.9})$$

Plugging (C.6), (C.7), and (C.9) into (C.4), we obtain

$$\begin{aligned} \mathbb{E}_{\text{init}}[\|\bar{g}(t) - \bar{g}_0(t)\|_2^2] &\leq 32c_1 B^3 \cdot m^{-1/2} \\ &+ 2\mathbb{E}_{\text{init}}\left[\left(12\mathbb{E}_\mu[\widehat{Q}_0(x)^2] + 12B^2 + 3\bar{r}^2\right) \cdot \left(\frac{1}{m} \sum_{r=1}^m \mathbb{1}\{|W_r(0)^\top x| \leq \|W_r(t) - W_r(0)\|_2\}\right)\right]. \end{aligned}$$

Invoking Lemmas D.1 and D.2, we obtain

$$\mathbb{E}_{\text{init}}[\|\bar{g}(t) - \bar{g}_0(t)\|_2^2] \leq (56c_1 B^3 + 24c_2 B + 6c_1 B\bar{r}^2) \cdot m^{-1/2},$$

which finishes the proof of Lemma 5.2.  $\square$

### C.3 Proof of Lemma 5.3

*Proof.* Recall that

$$\bar{g}(t) = \mathbb{E}_\mu[\delta(x, r, x'; W(t)) \cdot \nabla_W \widehat{Q}(x; W(t))], \quad (\text{C.10})$$

$$\bar{g}_0(t) = \mathbb{E}_\mu[\delta_0(x, r, x'; W(t)) \cdot \nabla_W \widehat{Q}_0(x; W(t))]. \quad (\text{C.11})$$

We denote the locally linearized population semigradient  $\bar{g}_0(t)$  evaluated at the approximate stationary point  $W^*$  by

$$\bar{g}_0^* = \mathbb{E}_\mu[\delta_0(x, r, x'; W^*) \cdot \nabla_W \widehat{Q}_0(x; W^*)]. \quad (\text{C.12})$$

For any  $W(t)$  ( $t \in [T]$ ), by the convexity of  $S_B$ , we have

$$\begin{aligned} \|W(t+1) - W^*\|_2^2 &= \|\Pi_{S_B}(W(t) - \eta \cdot \bar{g}(t)) - \Pi_{S_B}(W^* - \eta \cdot \bar{g}_0^*)\|_2^2 \\ &\leq \|(W(t) - \eta \cdot \bar{g}(t)) - (W^* - \eta \cdot \bar{g}_0^*)\|_2^2 \\ &= \|W(t) - W^*\|_2^2 - 2\eta \cdot (\bar{g}(t) - \bar{g}_0^*)^\top (W(t) - W^*) + \eta^2 \cdot \|\bar{g}(t) - \bar{g}_0^*\|_2^2. \end{aligned} \quad (\text{C.13})$$

We decompose the inner product  $(\bar{g}(t) - \bar{g}_0^*)^\top (W(t) - W^*)$  on the right-hand side of (C.13) into two terms,

$$\begin{aligned} (\bar{g}(t) - \bar{g}_0^*)^\top (W(t) - W^*) &= (\bar{g}_0(t) - \bar{g}_0^*)^\top (W(t) - W^*) + (\bar{g}(t) - \bar{g}_0(t))^\top (W(t) - W^*) \\ &\geq (\bar{g}_0(t) - \bar{g}_0^*)^\top (W(t) - W^*) - B \cdot \|\bar{g}(t) - \bar{g}_0(t)\|_2. \end{aligned} \quad (\text{C.14})$$

It remains to characterize the first term  $(\bar{g}_0(t) - \bar{g}_0^*)^\top (W(t) - W^*)$  on the right-hand side of (C.14), since the second term  $\|\bar{g}(t) - \bar{g}_0(t)\|_2$  is characterized by Lemma 5.2. Note that by (C.11) and (C.12), we have

$$\bar{g}_0(t) - \bar{g}_0^* = \mathbb{E}_\mu\left[\left(\delta_0(x, r, x'; W(t)) - \delta_0(x, r, x'; W^*)\right) \cdot \nabla_W \widehat{Q}_0(x; W(0))\right], \quad (\text{C.15})$$

where we use the following consequence of (4.7),

$$\nabla_W \widehat{Q}_0(x; W(0)) = \nabla_W \widehat{Q}_0(x; W^*).$$

Moreover, by (4.8) it holds that

$$\begin{aligned} \delta_0(x, r, x'; W(t)) - \delta_0(x, r, x'; W^*) &= \left(\widehat{Q}_0(x; W(t)) - \widehat{Q}_0(x; W^*)\right) - \gamma \left(\widehat{Q}_0(x'; W(t)) - \widehat{Q}_0(x'; W^*)\right). \end{aligned} \quad (\text{C.16})$$

Combining (4.7), (C.15), and (C.16), we have

$$\begin{aligned} &(\bar{g}_0(t) - \bar{g}_0^*)^\top (W(t) - W^*) \\ &= \mathbb{E}_\mu\left[\left(\delta_0(x, r, x'; W(t)) - \delta_0(x, r, x'; W^*)\right) \cdot \left(\nabla_W \widehat{Q}_0(x; W(0))^\top (W(t) - W^*)\right)\right] \\ &= \mathbb{E}_\mu\left[\left(\widehat{Q}_0(x; W(t)) - \widehat{Q}_0(x; W^*)\right)^2 \right. \\ &\quad \left. - \gamma \left(\widehat{Q}_0(x; W(t)) - \widehat{Q}_0(x; W^*)\right) \cdot \left(\widehat{Q}_0(x'; W(t)) - \widehat{Q}_0(x'; W^*)\right)\right] \\ &\geq (1 - \gamma) \cdot \mathbb{E}_\mu\left[\left(\widehat{Q}_0(x; W(t)) - \widehat{Q}_0(x; W^*)\right)^2\right], \end{aligned} \quad (\text{C.17})$$

where the last inequality is from the fact that  $x$  and  $x'$  have the same marginal distribution under  $\mu$  and therefore by the Cauchy-Schwarz inequality,

$$\begin{aligned} & \mathbb{E}_\mu \left[ \left( \widehat{Q}_0(x; W(t)) - \widehat{Q}_0(x; W^*) \right) \cdot \left( \widehat{Q}_0(x'; W(t)) - \widehat{Q}_0(x'; W^*) \right) \right] \\ & \leq \mathbb{E}_\mu \left[ \left( \widehat{Q}_0(x; W(t)) - \widehat{Q}_0(x; W^*) \right)^2 \right]^{1/2} \cdot \mathbb{E}_\mu \left[ \left( \widehat{Q}_0(x'; W(t)) - \widehat{Q}_0(x'; W^*) \right)^2 \right]^{1/2} \\ & = \mathbb{E}_\mu \left[ \left( \widehat{Q}_0(x; W(t)) - \widehat{Q}_0(x; W^*) \right)^2 \right]. \end{aligned}$$

Inequality (C.17) is the key to our convergence result. It shows that the locally linearized population semigradient update  $\bar{g}_0(t)$  is one-point monotonic to the approximate stationary point  $W^*$ .

Also, for  $\|\bar{g}(t) - \bar{g}_0^*\|_2^2$  on the right-hand side of (C.13), we have

$$\|\bar{g}(t) - \bar{g}_0^*\|_2^2 \leq 2\|\bar{g}_0(t) - \bar{g}_0^*\|_2^2 + 2\|\bar{g}(t) - \bar{g}_0(t)\|_2^2. \quad (\text{C.18})$$

For the first term on the right-hand side of (C.18), by (C.15), (C.16), and the Cauchy-Schwarz inequality, we have

$$\begin{aligned} \|\bar{g}_0(t) - \bar{g}_0^*\|_2^2 &= \left\| \mathbb{E}_\mu \left[ \left( \delta_0(x, r, x'; W(t)) - \delta_0(x, r, x'; W^*) \right) \cdot \nabla_W \widehat{Q}_0(x; W(0)) \right] \right\|_2^2 \\ &\leq \mathbb{E}_\mu \left[ \left( \widehat{Q}_0(x; W(t)) - \widehat{Q}_0(x; W^*) - \gamma \widehat{Q}_0(x'; W(t)) + \gamma \widehat{Q}_0(x'; W^*) \right)^2 \right] \\ &\leq 4\mathbb{E}_\mu \left[ \left( \widehat{Q}_0(x; W(t)) - \widehat{Q}_0(x; W^*) \right)^2 \right], \end{aligned} \quad (\text{C.19})$$

where the first inequality follows from the fact

$$\|\nabla_W \widehat{Q}_0(x; W(0))\|_2 \leq \|x\|_2 = 1.$$

Plugging (C.17), (C.18), and (C.19) into (C.13), we finish the proof of Lemma 5.3.  $\square$

#### C.4 Proof of Lemma 5.4

*Proof.* For any  $W(t)$  ( $t \in [T]$ ), by the convexity of  $S_B$ , (4.10), and (C.12), we have

$$\begin{aligned} \|W(t+1) - W^*\|_2^2 &= \|\Pi_{S_B}(W(t) - \eta \cdot g(t)) - \Pi_{S_B}(W^* - \eta \cdot \bar{g}_0^*)\|_2^2 \\ &\leq \|(W(t) - \eta \cdot g(t)) - (W^* - \eta \cdot \bar{g}_0^*)\|_2^2 \\ &= \|W(t) - W^*\|_2^2 - 2\eta \cdot (g(t) - \bar{g}_0^*)^\top (W(t) - W^*) + \eta^2 \cdot \|g(t) - \bar{g}_0^*\|_2^2. \end{aligned}$$

Taking expectation on both sides conditional on  $W(t)$ , we obtain

$$\begin{aligned} & \mathbb{E}_\mu [\|W(t+1) - W^*\|_2^2 \mid W(t)] \\ & \leq \|W(t) - W^*\|_2^2 - 2\eta \cdot (\bar{g}(t) - \bar{g}_0^*)^\top (W(t) - W^*) + \eta^2 \cdot \mathbb{E}_\mu [\|g(t) - \bar{g}_0^*\|_2^2 \mid W(t)]. \end{aligned} \quad (\text{C.20})$$

For the inner product  $(\bar{g}(t) - \bar{g}_0^*)^\top (W(t) - W^*)$  on the right-hand side of (C.20), it follows from (C.14) and (C.17) that

$$(\bar{g}(t) - \bar{g}_0^*)^\top (W(t) - W^*) \geq (1 - \gamma) \cdot \mathbb{E}_\mu \left[ \left( \widehat{Q}_0(x; W(t)) - \widehat{Q}_0(x; W^*) \right)^2 \right] - B \cdot \|\bar{g}(t) - \bar{g}_0(t)\|_2.$$

Meanwhile, for  $\mathbb{E}_\mu [\|g(t) - \bar{g}_0^*\|_2^2 \mid W(t)]$  on the right-hand side of (C.20), we have the decomposition

$$\begin{aligned} \mathbb{E}_\mu [\|g(t) - \bar{g}_0^*\|_2^2 \mid W(t)] &= \|\bar{g}(t) - \bar{g}_0^*\|_2^2 + \mathbb{E}_\mu [\|g(t) - \bar{g}(t)\|_2^2 \mid W(t)] \\ &\leq 8\mathbb{E}_\mu \left[ \left( \widehat{Q}_0(x; W(t)) - \widehat{Q}_0(x; W^*) \right)^2 \mid W(t) \right] + 2\|\bar{g}(t) - \bar{g}_0(t)\|_2^2 + \mathbb{E}_\mu [\|g(t) - \bar{g}(t)\|_2^2 \mid W(t)], \end{aligned}$$

where the inequality follows from (C.18) and (C.19). Taking expectation on the both sides of (C.20) with respect to  $W(t)$ , we complete the proof of Lemma 5.4.  $\square$

### C.5 Proof of Theorem 4.4

*Proof.* By Lemma 5.2 we have

$$\mathbb{E}_{\text{init}}[\|\bar{g}(t) - \bar{g}_0(t)\|_2^2] = O(B^3 m^{-1/2}), \quad (\text{C.21})$$

$$\mathbb{E}_{\text{init}}[B \cdot \|\bar{g}(t) - \bar{g}_0(t)\|_2] = O(B^{5/2} m^{-1/4}). \quad (\text{C.22})$$

Setting  $\eta = (1 - \gamma)/8$  in Algorithm 1, by (C.21), (C.22), and Lemma 5.3, we have

$$\begin{aligned} \mathbb{E}_{\text{init}, \mu} \left[ \left( \hat{Q}_0(x; W(t)) - \hat{Q}_0(x; W^*) \right)^2 \right] &= \frac{\mathbb{E}_{\text{init}}[\|W(t) - W^*\|_2^2 - \|W(t+1) - W^*\|_2^2]}{(1 - \gamma)^2/8} \\ &\quad + O(B^3 m^{-1/2} + B^{5/2} m^{-1/4}). \end{aligned} \quad (\text{C.23})$$

Telescoping (C.23) for  $t = 0, \dots, T - 1$ , we obtain

$$\begin{aligned} &\frac{1}{T} \sum_{t=0}^{T-1} \mathbb{E}_{\text{init}, \mu} \left[ \left( \hat{Q}_0(x; W(t)) - \hat{Q}_0(x; W^*) \right)^2 \right] \\ &= \frac{\mathbb{E}_{\text{init}}[\|W(0) - W^*\|_2^2 - \|W(T) - W^*\|_2^2]}{T(1 - \gamma)^2/8} + O(B^3 m^{-1/2} + B^{5/2} m^{-1/4}) \\ &\leq \frac{8B^2}{T(1 - \gamma)^2} + O(B^3 m^{-1/2} + B^{5/2} m^{-1/4}). \end{aligned}$$

Recall that as define in (4.7),  $\hat{Q}_0(\cdot; W)$  is linear in  $W$ . By Jensen's inequality, we have

$$\mathbb{E}_{\text{init}, \mu} \left[ \left( \hat{Q}_0(x; \bar{W}) - \hat{Q}_0(x; W^*) \right)^2 \right] \leq \frac{8B^2}{T(1 - \gamma)^2} + O(B^3 m^{-1/2} + B^{5/2} m^{-1/4}). \quad (\text{C.24})$$

Next we characterize the output  $\hat{Q}_{\text{out}}(\cdot) = \hat{Q}(\cdot; \bar{W})$  of Algorithm 1. Since  $S_B$  is convex and  $\bar{W} \in S_B$ , by Lemma 5.1 we have

$$\mathbb{E}_{\text{init}, \mu} \left[ \left( \hat{Q}_0(x; \bar{W}) - \hat{Q}_0(x; W^*) \right)^2 \right] = O(B^3 m^{-1/2}). \quad (\text{C.25})$$

Using the Cauchy-Schwarz inequality we have

$$\begin{aligned} &\mathbb{E}_{\text{init}, \mu} \left[ \left( \hat{Q}_{\text{out}}(x) - \hat{Q}_0(x; W^*) \right)^2 \right] \\ &\leq \mathbb{E}_{\text{init}, \mu} \left[ \left( \hat{Q}(x; \bar{W}) - \hat{Q}_0(x; \bar{W}) \right)^2 \right] + 2 \left( \hat{Q}_0(x; \bar{W}) - \hat{Q}_0(x; W^*) \right)^2, \end{aligned}$$

into which we plugging (C.24) and (C.25) and obtain

$$\mathbb{E}_{\text{init}, \mu} \left[ \left( \hat{Q}_{\text{out}}(x) - \hat{Q}_0(x; W^*) \right)^2 \right] \leq \frac{16B^2}{T(1 - \gamma)^2} + O(B^3 m^{-1/2} + B^{5/2} m^{-1/4}), \quad (\text{C.26})$$

which completes the proof of Theorem 4.4.  $\square$

### C.6 Proof of Theorem 4.6

*Proof.* Similar to (C.23), by Lemmas 4.5, 5.2, and 5.4 we have

$$\begin{aligned} &\mathbb{E}_{\text{init}, \mu} \left[ \left( \hat{Q}_0(x; W(t)) - \hat{Q}_0(x; W^*) \right)^2 \right] \\ &\leq \frac{\mathbb{E}_{\text{init}}[\|W(t) - W^*\|_2^2] - \mathbb{E}_{\text{init}}[\|W(t+1) - W^*\|_2^2] + \eta^2 \cdot \sigma_g^2}{2\eta(1 - \gamma) - 8\eta^2} \\ &\quad + O(B^3 m^{-1/2} + B^{5/2} m^{-1/4}). \end{aligned} \quad (\text{C.27})$$

Telescoping (C.27) for  $t = 0, \dots, T - 1$ , by  $\eta^2 \leq 1/T$  we have

$$\begin{aligned} &\frac{1}{T} \sum_{t=0}^{T-1} \mathbb{E}_{\text{init}, \mu} \left[ \left( \hat{Q}_0(x; W(t)) - \hat{Q}_0(x; W^*) \right)^2 \right] \\ &\leq \frac{\mathbb{E}_{\text{init}}[\|W(0) - W^*\|_2^2] + \sigma_g^2}{T \cdot (2\eta(1 - \gamma) - 8\eta^2)} + O(B^3 m^{-1/2} + B^{5/2} m^{-1/4}) \\ &\leq \frac{B^2 + \sigma_g^2}{\sqrt{T}} \cdot \frac{1}{\sqrt{T} \cdot (2\eta(1 - \gamma) - 8\eta^2)} + O(B^3 m^{-1/2} + B^{5/2} m^{-1/4}), \end{aligned} \quad (\text{C.28})$$



where  $\eta = \min\{1/\sqrt{T}, (1-\gamma)/8\}$ . Note that when  $T \geq (8/(1-\gamma))^2$ , we have  $\eta = 1/\sqrt{T}$  and

$$\sqrt{T} \cdot (2\eta(1-\gamma) - 8\eta^2) = 2(1-\gamma) - 8/\sqrt{T} \geq 1-\gamma.$$

Meanwhile, when  $T < (8/(1-\gamma))^2$ , we have  $\eta = (1-\gamma)/8$  and

$$\sqrt{T} \cdot (2\eta(1-\gamma) - 8\eta^2) = \sqrt{T} \cdot (1-\gamma)^2/8 \geq (1-\gamma)^2/8.$$

Since  $|1-\gamma| < 1$ , we obtain that for any  $T \in \mathbb{N}$ ,

$$\frac{1}{\sqrt{T} \cdot (2\eta(1-\gamma) - 8\eta^2)} \leq \frac{8}{(1-\gamma)^2}. \quad (\text{C.29})$$

Similar to (C.24) and (C.26), by combining (C.28) and (C.29) with Lemma 5.1, we obtain

$$\mathbb{E}_{\text{init}, \mu} [(\widehat{Q}_{\text{out}}(x) - \widehat{Q}_0(x; W^*))^2] \leq \frac{16(B^2 + \sigma_g^2)}{\sqrt{T} \cdot (1-\gamma)^2} + O(B^3 m^{-1/2} + B^{5/2} m^{-1/4}),$$

which completes the proof of Theorem 4.6.  $\square$

## D Auxiliary Lemmas

Under Assumption 4.3, we establish the following auxiliary lemmas on the random initialization  $W(0)$  and the stationary distribution  $\mu$ , which plays a key role in quantifying the error of local linearization.

**Lemma D.1.** There exists a constant  $c_1 > 0$  such that for any random vector  $W$  with  $\|W - W(0)\|_2 \leq B$ , it holds that

$$\mathbb{E}_{\text{init}, \mu} \left[ \frac{1}{m} \sum_{r=1}^m \mathbb{1}\{|W_r(0)^\top x| \leq \|W_r - W_r(0)\|_2\} \right] \leq c_1 B \cdot m^{-1/2}. \quad (\text{D.1})$$

*Proof.* By Assumption 4.3, we have

$$\begin{aligned} & \mathbb{E}_{\text{init}, \mu} \left[ \frac{1}{m} \sum_{r=1}^m \mathbb{1}\{|W_r(0)^\top x| \leq \|W_r - W_r(0)\|_2\} \right] \\ & \leq \mathbb{E}_{\text{init}} \left[ \frac{1}{m} \sum_{r=1}^m c_0 \cdot \|W_r - W_r(0)\|_2 / \|W_r(0)\|_2 \right]. \end{aligned} \quad (\text{D.2})$$

Applying Hölder's inequality to the right-hand side, we obtain

$$\begin{aligned} & \mathbb{E}_{\text{init}, \mu} \left[ \frac{1}{m} \sum_{r=1}^m \mathbb{1}\{|W_r(0)^\top x| \leq \|W_r - W_r(0)\|_2\} \right] \\ & \leq c_0/m \cdot \mathbb{E}_{\text{init}} \left[ \left( \sum_{r=1}^m \|W_r - W_r(0)\|_2^2 \right)^{1/2} \cdot \left( \sum_{r=1}^m \frac{1}{\|W_r(0)\|_2^2} \right)^{1/2} \right] \\ & \leq c_0 B \cdot m^{-1/2} \cdot \mathbb{E}_{w \sim N(0, I_d/d)} [1/\|w\|_2^2]^{1/2}, \end{aligned} \quad (\text{D.3})$$

where the second inequality follows from

$$\mathbb{E}_{\text{init}} \left[ \left( \sum_{r=1}^m \frac{1}{\|W_r(0)\|_2^2} \right)^{1/2} \right] \leq \mathbb{E}_{\text{init}} \left[ \sum_{r=1}^m \frac{1}{\|W_r(0)\|_2^2} \right]^{1/2} = \sqrt{m} \cdot \mathbb{E}_{w \sim N(0, I_d/d)} [1/\|w\|_2^2]^{1/2}. \quad (\text{D.4})$$

Setting  $c_1 = c_0 \cdot \mathbb{E}_{w \sim N(0, I_d/d)} [1/\|w\|_2^2]^{1/2}$ , we complete the proof of Lemma D.1.  $\square$

**Lemma D.2.** There exists a constant  $c_2 > 0$  such that for any random vector  $W$  with  $\|W - W(0)\|_2 \leq B$ , it holds that

$$\mathbb{E}_{\text{init}} \left[ \mathbb{E}_\mu [\widehat{Q}_0(x)^2] \cdot \mathbb{E}_\mu \left[ \frac{1}{m} \sum_{r=1}^m \mathbb{1}\{|W_r(0)^\top x| \leq \|W_r - W_r(0)\|_2\} \right] \right] \leq c_2 B \cdot m^{-1/2}. \quad (\text{D.5})$$

*Proof.* By the definition of  $\widehat{Q}_0(x) = \widehat{Q}_0(x; W(0))$  in (4.7), we have

$$\mathbb{E}_\mu[\widehat{Q}_0(x)^2] = 1/m \cdot \mathbb{E}_\mu \left[ \sum_{r=1}^m \sigma(W_r(0)^\top x)^2 + \sum_{r \neq s} b_r b_s \sigma(W_r(0)^\top x) \sigma(W_s(0)^\top x) \right].$$

Following the same derivation of (D.2) and (D.3), we have

$$\begin{aligned} & \mathbb{E}_{\text{init}} \left[ \mathbb{E}_\mu[\widehat{Q}_0(x)^2] \cdot \mathbb{E}_\mu \left[ \frac{1}{m} \sum_{r=1}^m \mathbb{1}\{|W_r(0)^\top x| \leq \|W_r - W_r(0)\|_2\} \right] \right] \\ & \leq \mathbb{E}_{\text{init}} \left[ 1/m \cdot \mathbb{E}_\mu \left[ \sum_{r=1}^m \sigma(W_r(0)^\top x)^2 + \sum_{r \neq s} b_r b_s \sigma(W_r(0)^\top x) \sigma(W_s(0)^\top x) \right] \right. \\ & \quad \left. \cdot c_0/m \cdot \left( \sum_{r=1}^m \|W_r - W_r(0)\|_2^2 \right)^{1/2} \cdot \left( \sum_{r=1}^m \frac{1}{\|W_r(0)\|_2^2} \right)^{1/2} \right]. \end{aligned}$$

Note that  $b_r$  and  $b_s$  are independent of  $W(0)$  and  $\mathbb{E}_{\text{init}}[b_r b_s] = 0$ . Thus, we obtain

$$\begin{aligned} & \mathbb{E}_{\text{init}} \left[ \mathbb{E}_\mu[\widehat{Q}_0(x)^2] \cdot \mathbb{E}_\mu \left[ \frac{1}{m} \sum_{r=1}^m \mathbb{1}\{|W_r(0)^\top x| \leq \|W_r - W_r(0)\|_2\} \right] \right] \\ & \leq c_0 B/m^2 \cdot \mathbb{E}_{\text{init}} \left[ \mathbb{E}_\mu \left[ \sum_{r=1}^m \sigma(W_r(0)^\top x)^2 \right] \cdot \left( \sum_{r=1}^m \frac{1}{\|W_r(0)\|_2^2} \right)^{1/2} \right]. \end{aligned}$$

By the definition of  $\sigma(W_r(0)^\top x)$  and the fact that  $\|x\|_2 = 1$ , we have

$$\mathbb{E}_\mu \left[ \sum_{r=1}^m \sigma(W_r(0)^\top x)^2 \right] \leq \sum_{r=1}^m \|W_r(0)\|_2^2.$$

Hence, it holds that

$$\begin{aligned} & \mathbb{E}_{\text{init}} \left[ \mathbb{E}_\mu[\widehat{Q}_0(x)^2] \cdot \mathbb{E}_\mu \left[ \frac{1}{m} \sum_{r=1}^m \mathbb{1}\{|W_r(0)^\top x| \leq \|W_r - W_r(0)\|_2\} \right] \right] \\ & \leq c_0 B/m^2 \cdot \mathbb{E}_{\text{init}} \left[ \left( \sum_{r=1}^m \|W_r(0)\|_2^2 \right) \cdot \left( \sum_{r=1}^m \frac{1}{\|W_r(0)\|_2^2} \right)^{1/2} \right] \\ & \leq c_0 B/m^2 \cdot \mathbb{E}_{\text{init}} \left[ \left( \sum_{r=1}^m \|W_r(0)\|_2^2 \right)^2 \right]^{1/2} \cdot \mathbb{E}_{\text{init}} \left[ \sum_{r=1}^m \frac{1}{\|W_r(0)\|_2^2} \right]^{1/2}. \end{aligned} \quad (\text{D.6})$$

By (D.4) and the fact that

$$\mathbb{E}_{\text{init}} \left[ \left( \sum_{r=1}^m \|W_r(0)\|_2^2 \right)^2 \right] = m \cdot \mathbb{E}_{w \sim N(0, I_d/d)} [\|w\|_2^4] + m(m-1) \cdot \mathbb{E}_{w \sim N(0, I_d/d)} [\|w\|_2^2]^2 = O(m^2),$$

the right-hand side of (D.6) is  $O(Bm^{-1/2})$ . Setting

$$c_2 = c_0 \cdot \left( \mathbb{E}_{w \sim N(0, I_d/d)} [\|w\|_2^4] + \mathbb{E}_{w \sim N(0, I_d/d)} [\|w\|_2^2]^2 \right)^{1/2} \cdot \mathbb{E}_{w \sim N(0, I_d/d)} [1/\|w\|_2^2]^{1/2},$$

we complete the proof of Lemma D.2.  $\square$
